# Supplementary material
Source: publisher figshare collection journal article supplement (https://gsajournals.figshare.com/ndownloader/files/24740741)
Supplement: Supplementary file 1 [file 24740741]

**Table S5, Fraction of callable sites under various assumptions of read proportions at *de novo* mutant sites**

| **Predicted read prop.** | **Callable Sites** | **Fraction Callable** | **Genotype** |
| --- | --- | --- | --- |
| No correction | 228658300 | 1.000 | GP23 |
|  | 227453248 | 1.000 | CC |
|  | 205760440 | 1.000 | GPL7 |
| 0.5 | 203374942 | 0.889 | GP23 |
|  | 203533810 | 0.895 | CC |
|  | 164847994 | 0.801 | GPL7 |
| 0.2 | 109653850 | 0.480 | GP23 |
|  | 108319605 | 0.476 | CC |
|  | 48845059 | 0.237 | GPL7 |
| 0.1 | 27002716 | 0.118 | GP23 |
|  | 25196816 | 0.111 | CC |
|  | 6317669 | 0.031 | GPL7 |
| 0.28 | 159677858 | 0.698 | GP23 |
|  | 160354540 | 0.705 | CC |
| 0.34 | 122583703 | 0.596 | GPL7 |
